# Supplementary material
Source: Royal Society of Chemistry journal article supplement (doi:10.1039/d6tc00918b)
Supplement: d6tc00918b1.pdf [file d6tc00918b1.pdf]

ARTICLE

Supplementary Information

1 High-Temperature Energy Storage Performance of BOPP Film<sup>8</sup>

Tab.1-1 Maximum Discharge Energy Density of BOPP Film ( $\eta > 90\%$ )

| Temperature(°C) | BOPP(J/cm <sup>3</sup> ) | Modified Laminated BOPP Structure(J/cm <sup>3</sup> ) |
|-----------------|--------------------------|-------------------------------------------------------|
| 25              | 3.9-4.1                  | 4.6-5.0                                               |
| 75              | 1.5-1.7                  | 3.6-4.0                                               |
| 100             | 0.8-1.0                  | 3.7-3.9                                               |
| 125             | 0.08                     | 1.5-1.7                                               |

2 Specific Parameters of the Weibull Distribution for Breakdown Strength and Flashover Voltage

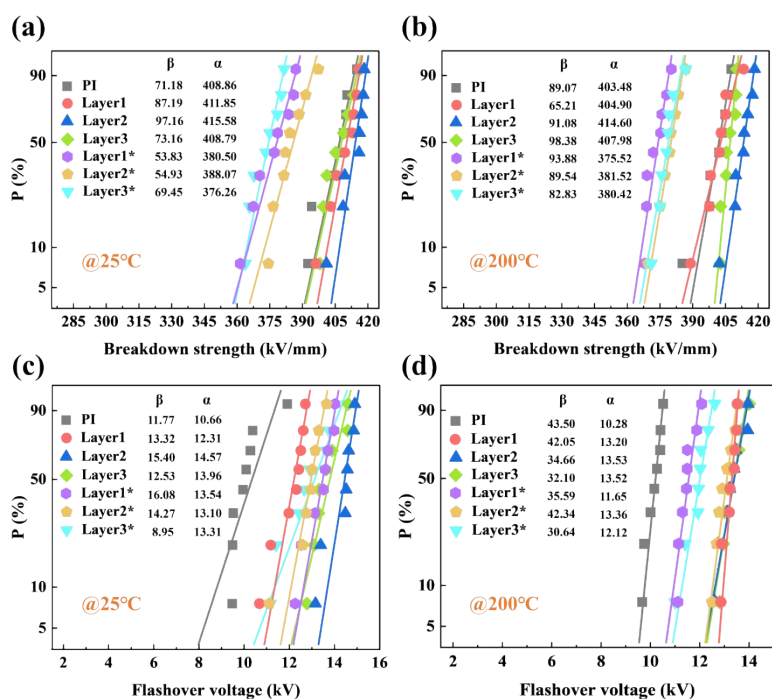

Fig. 2-1 (a, b) Breakdown strength at 25° C and 200° C; (c, d) Flashover voltage at 25° C and 200° C. 3 Peak-Fitting Results for the Trap-Level Distributions of the Sample Groups

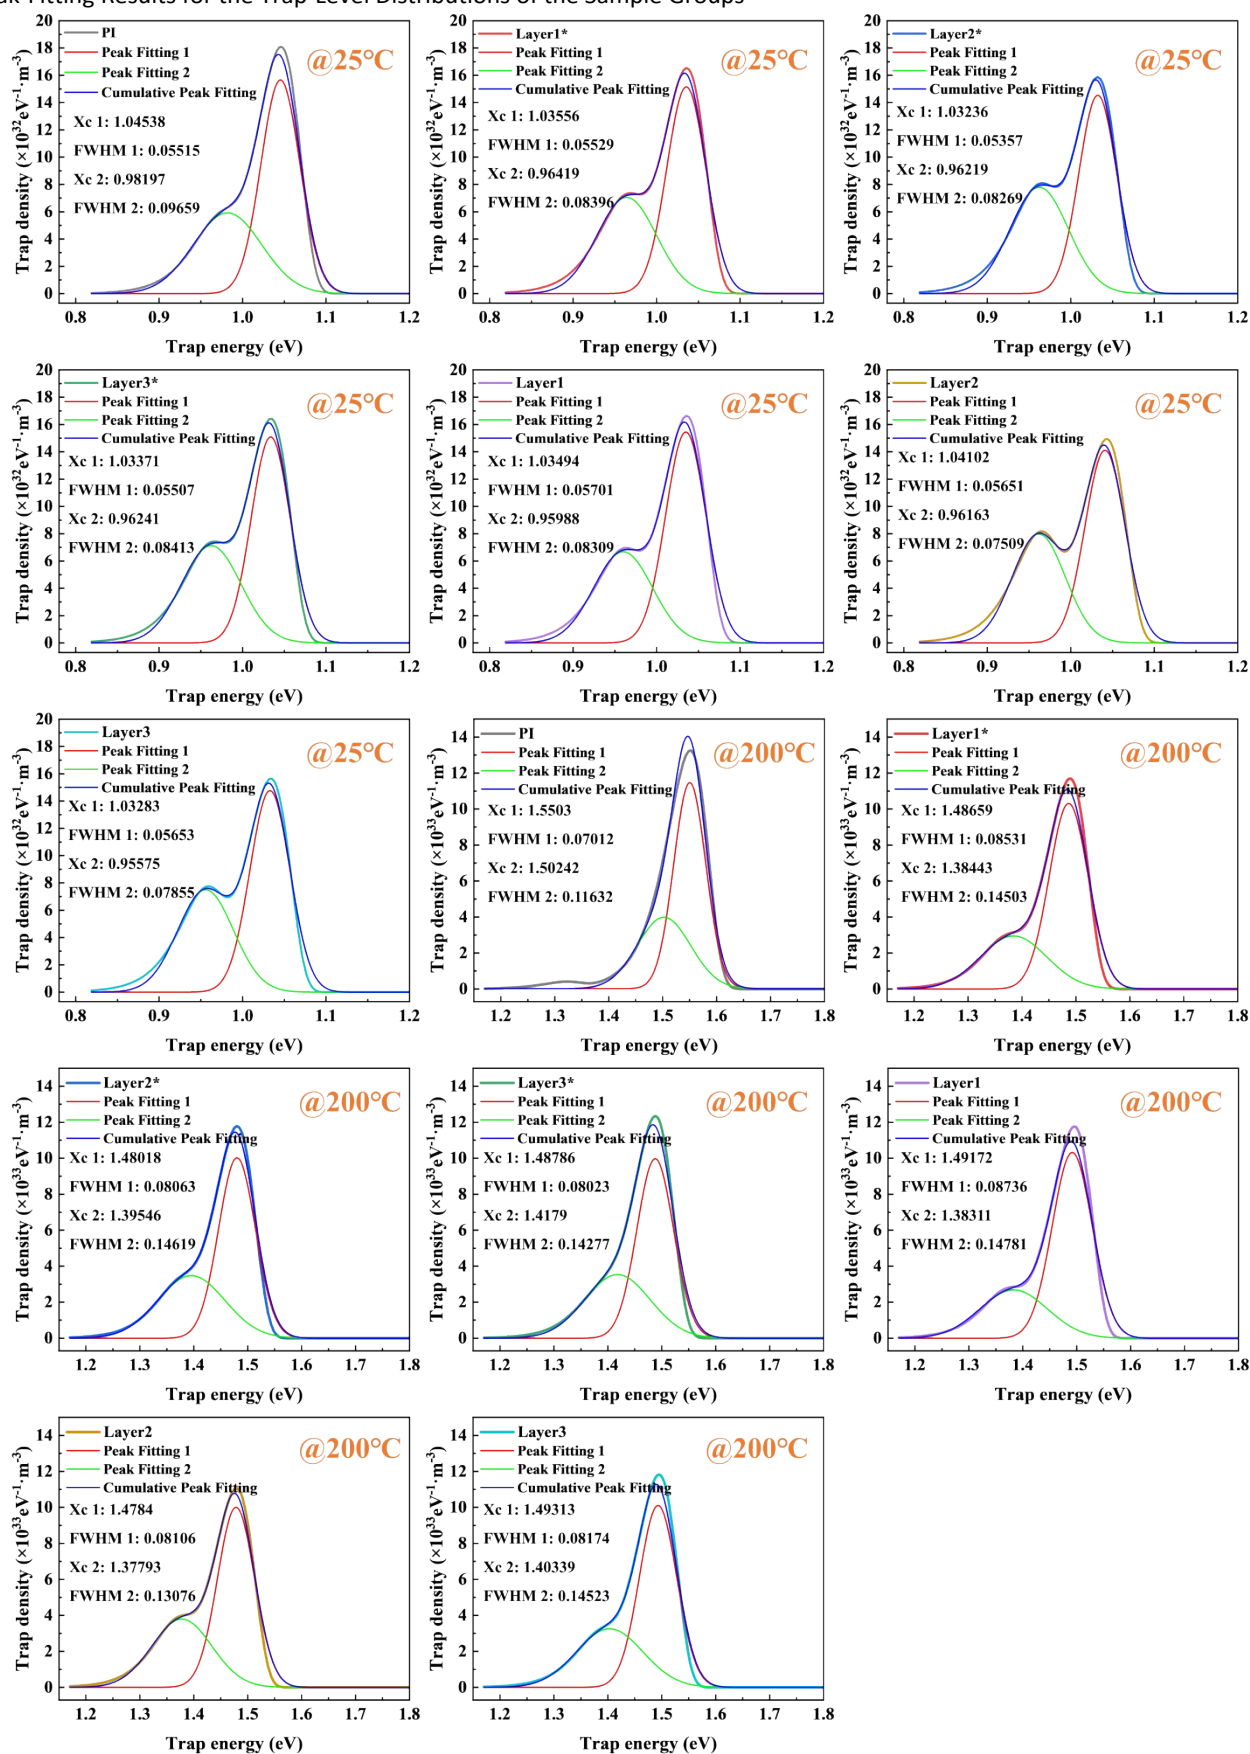

Fig. 3-1

4 Hysteresis Loops of Various Samples under Different Electric Field Strengths

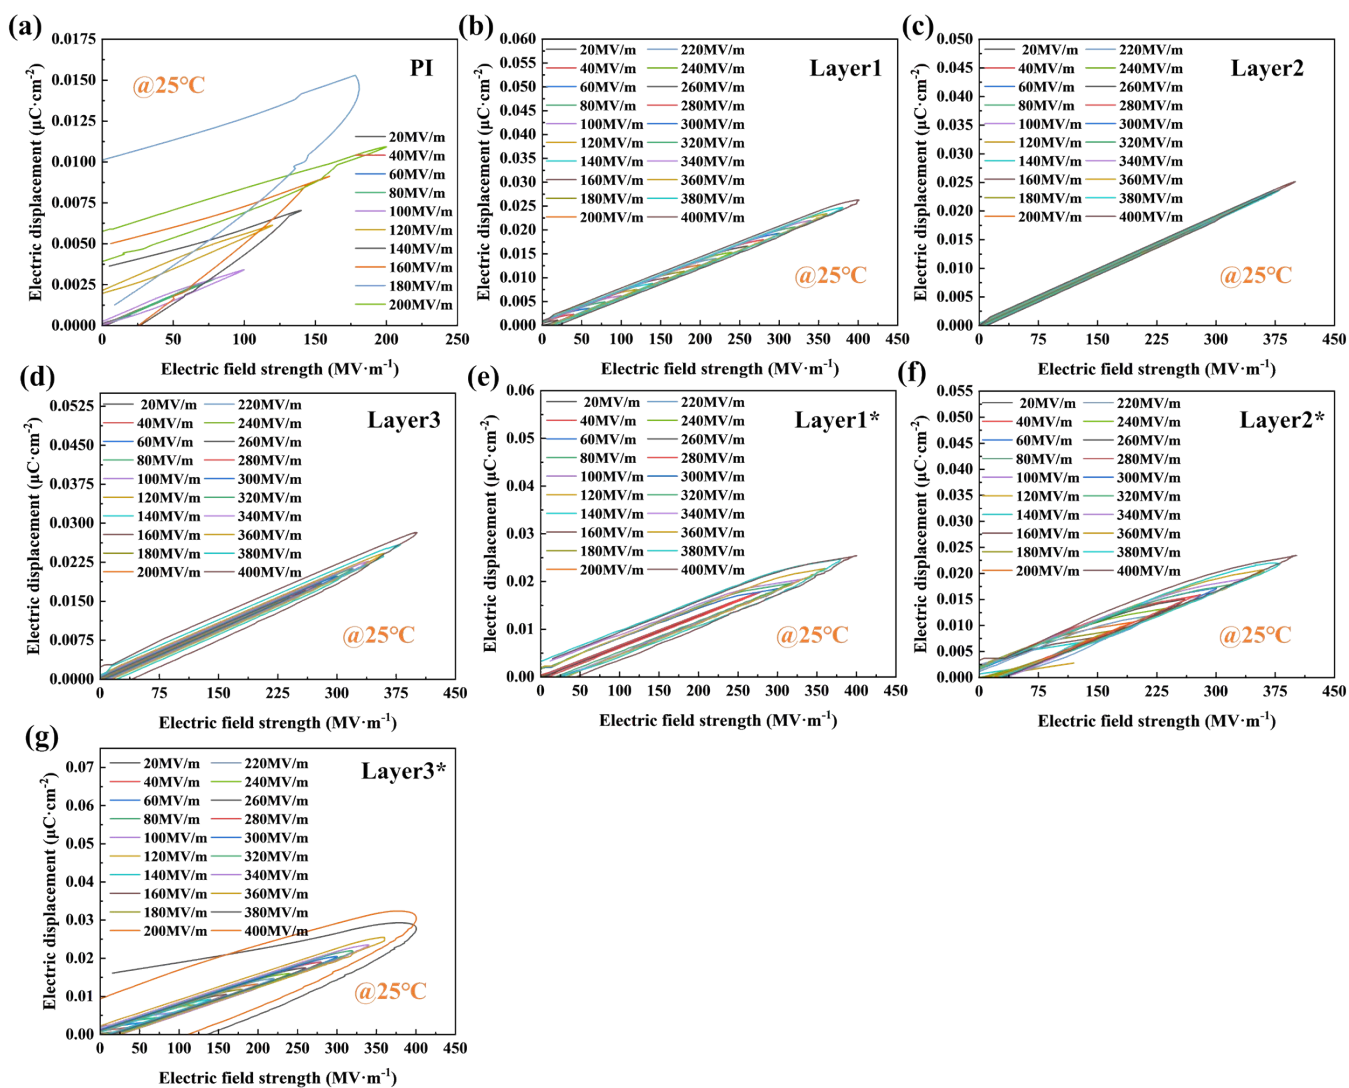

Fig. 4-1 25°C

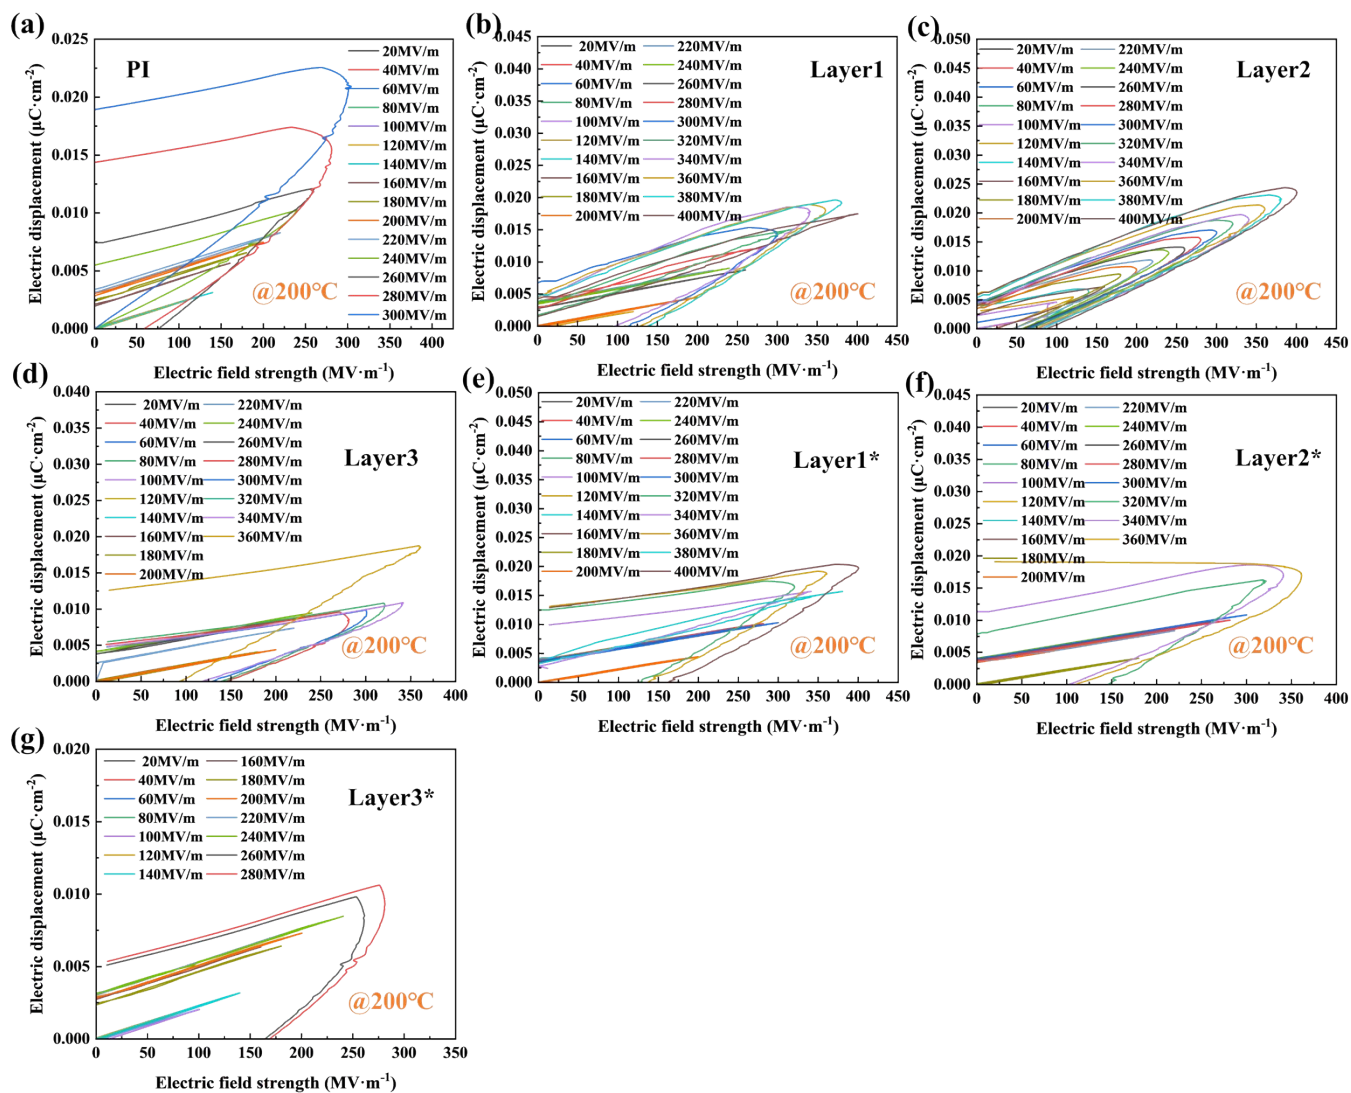Fig. 4-2  $200^\circ\text{C}$ 

## 5 Fatigue Testing

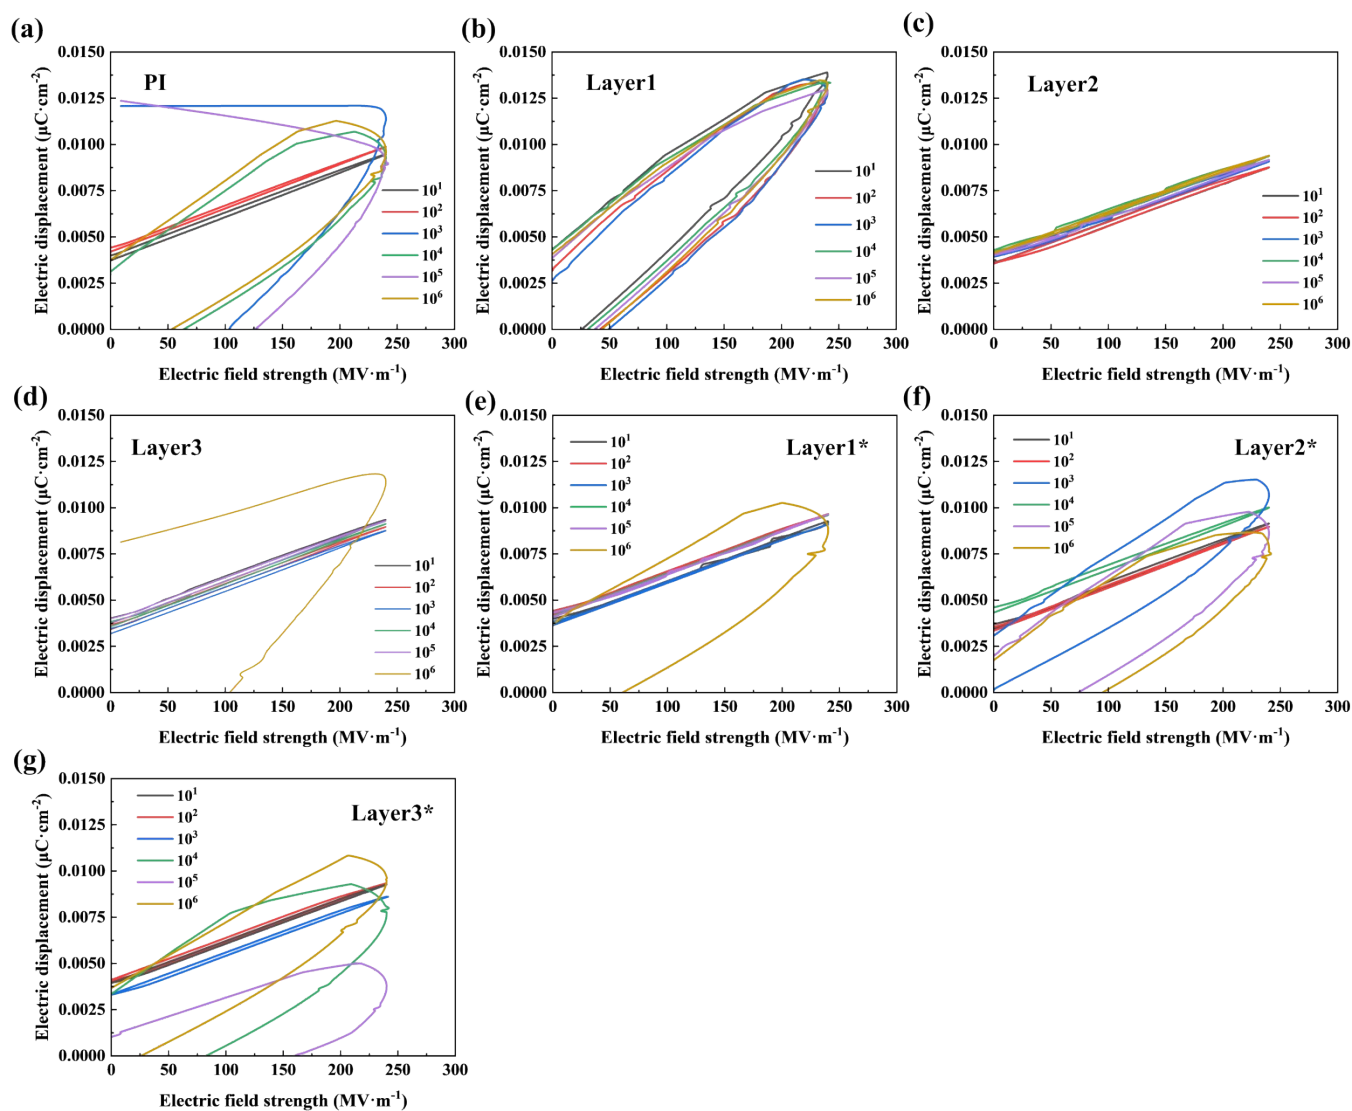

Fig. 5-1

6 This paper employs the **Materials Studio** software to perform simulation calculations on plasma-treated PI molecules, the interfacial phase molecules formed with DGEBA, and the BST@S core-shell structure; the relevant calculation modules and molecular models are presented below.

### 6.1 Construction of Models for Potential Structures and Functional Group Grafting Sites of PI Molecules Following Plasma Oxidation

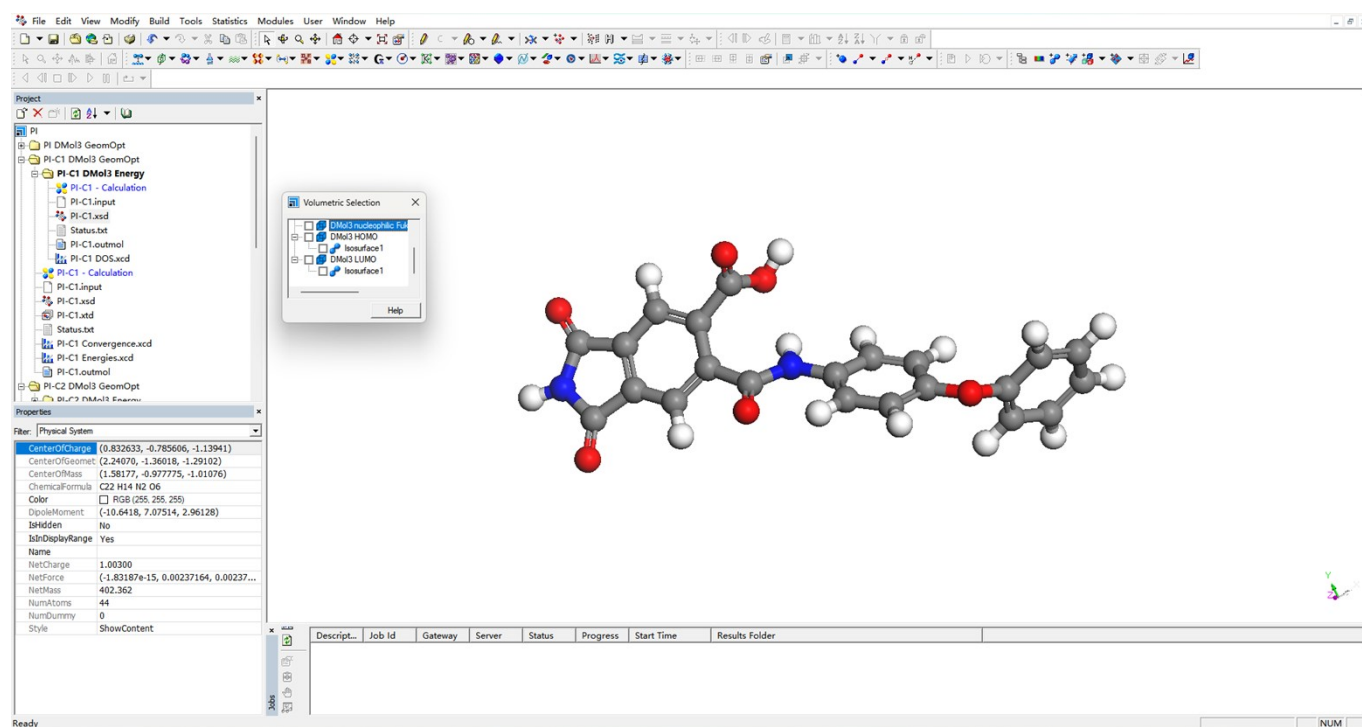

Fig. 6-1

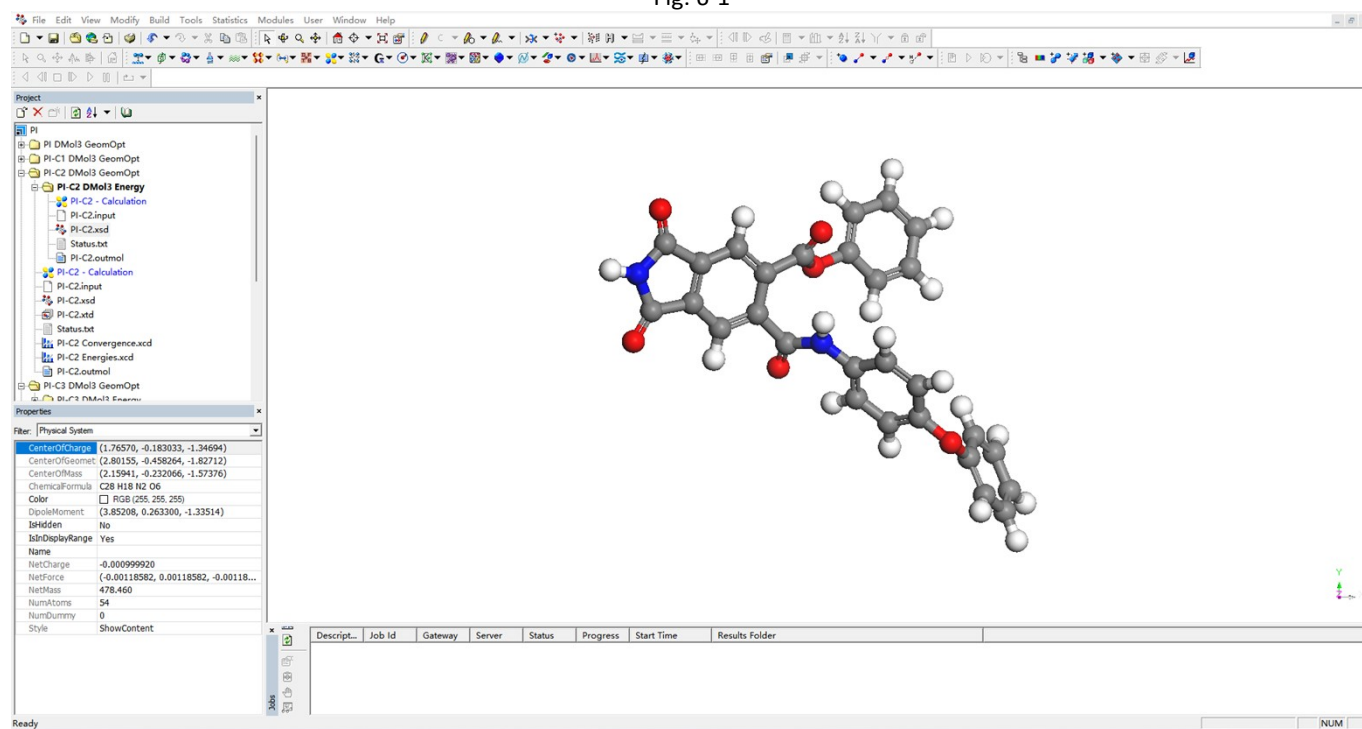

Fig. 6-2

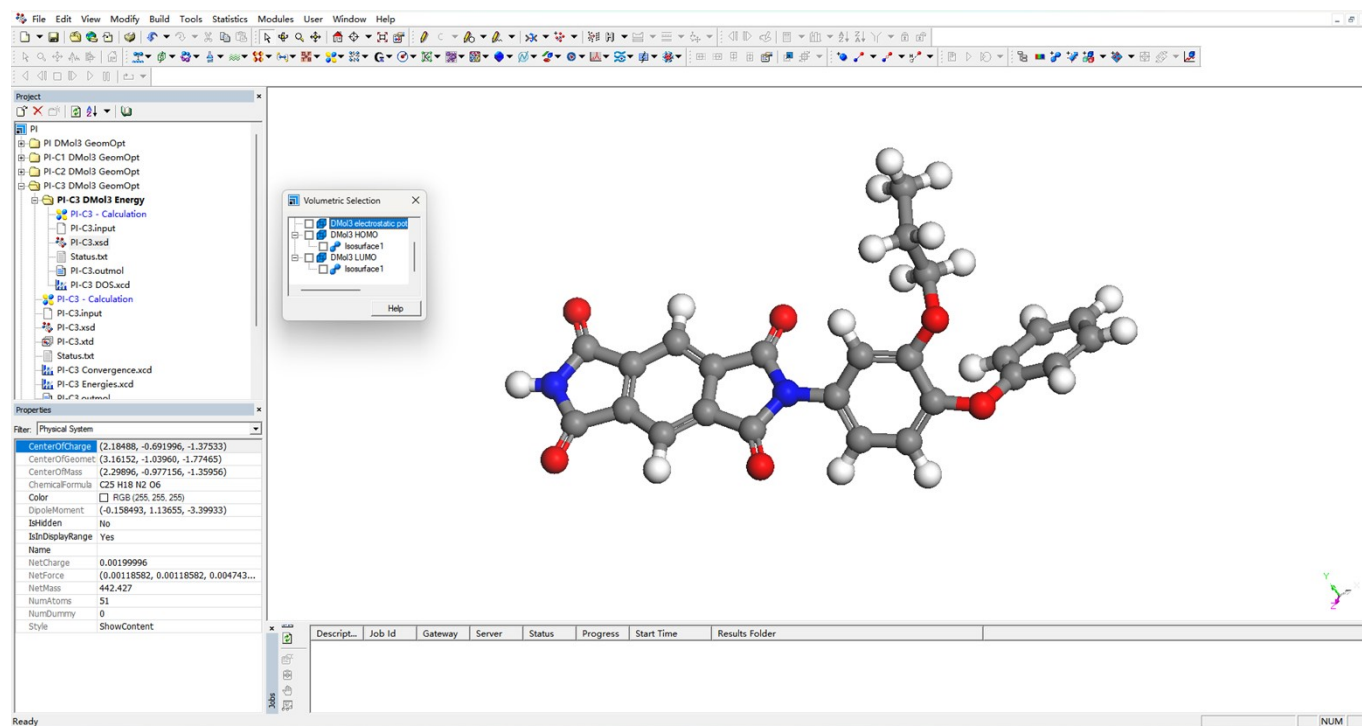

Fig. 6-3

## 6.2 Utilizing the DMol3 Module to Calculate Parameters Such as the Molecular Electrostatic Potential and Frontier Orbitals of the PI-DGEBA Interface Phase

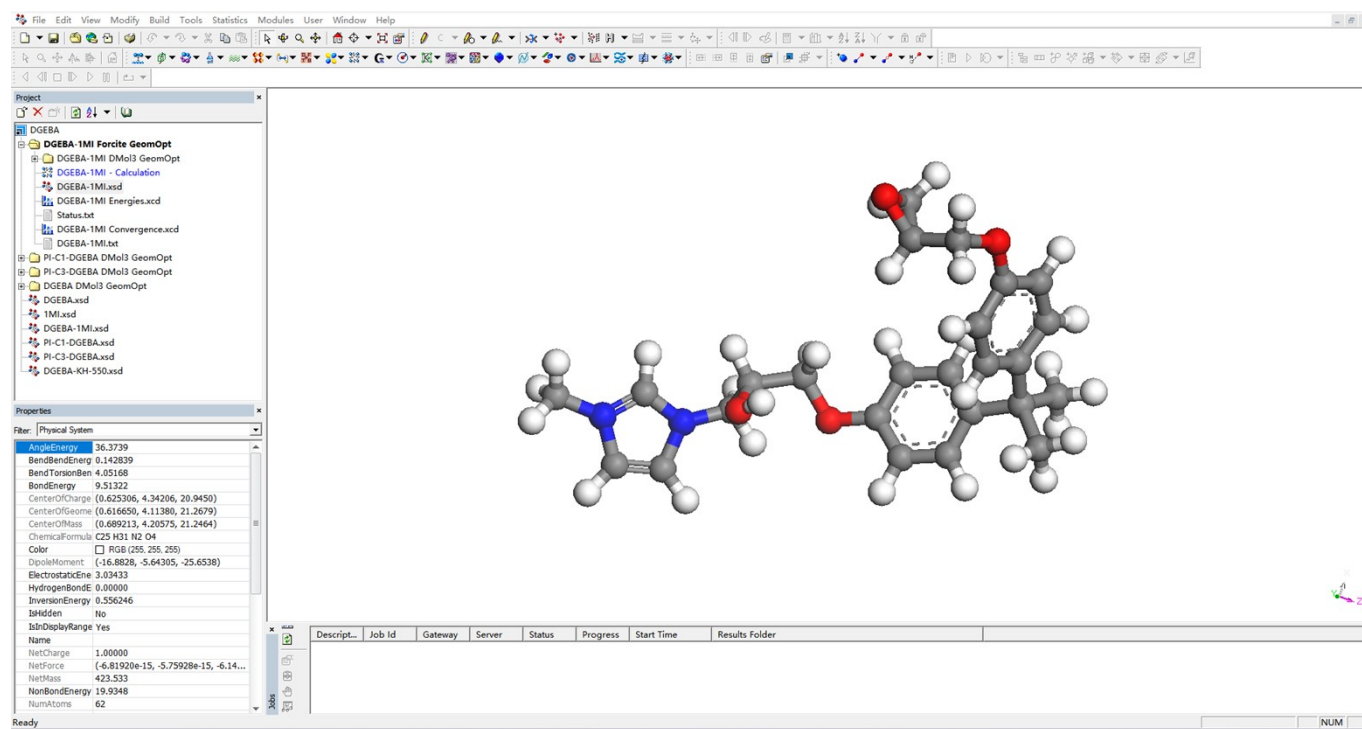

Fig. 6-4 1MI-DGEBA

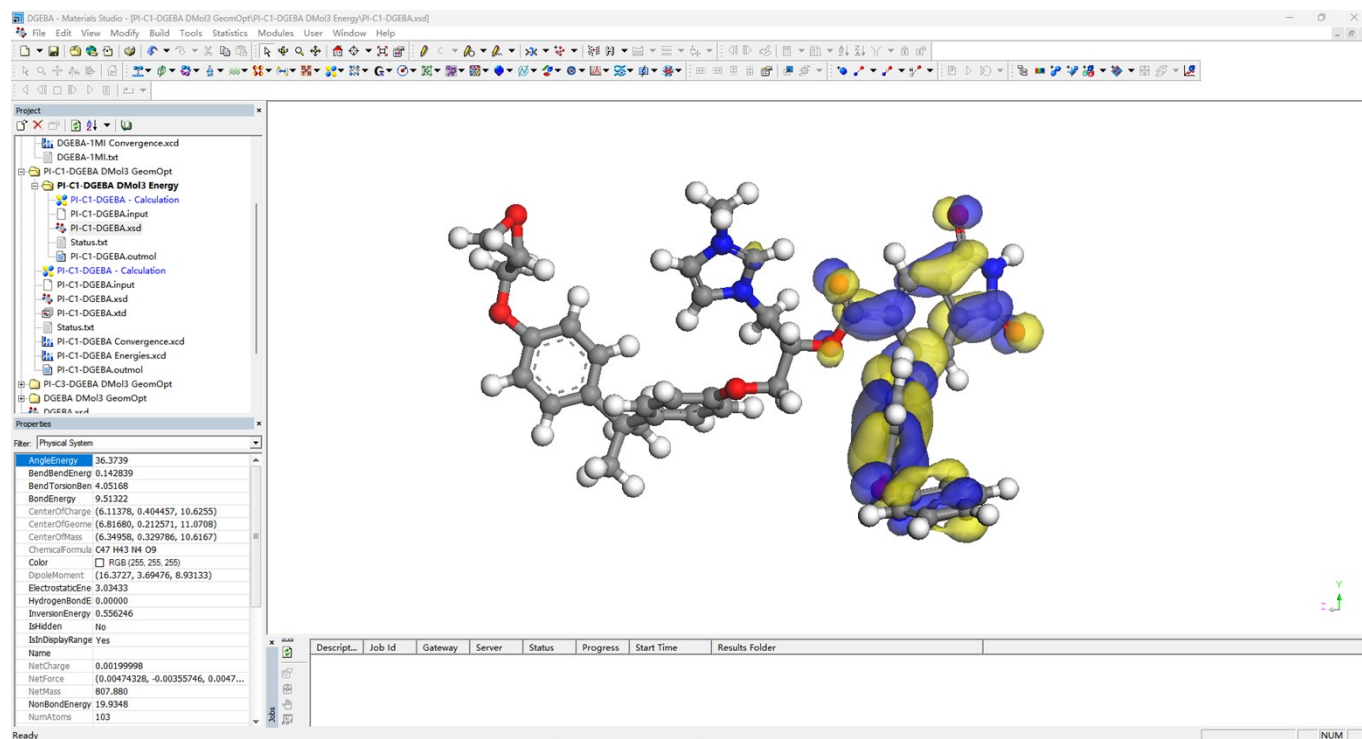

Fig. 6-5 PI-1MI-DGEBA

### 6.3 Constructing a BST@S-KH550 Interfacial Model Using the Amorphous Cell Module

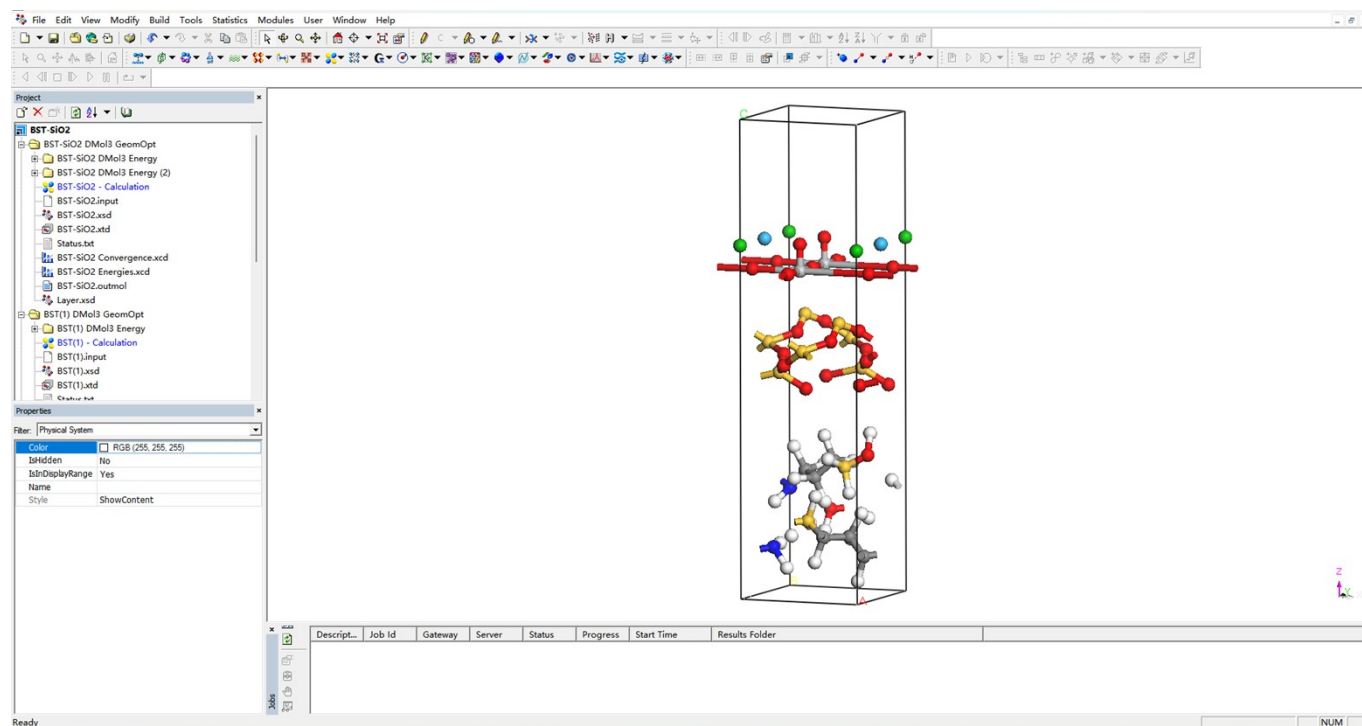

Fig. 6-6

### 6.4 Calculate the Binding Energy Between Interfaces of BST@S-KH550 Using the Forcite Module

File Edit View Modify Build Tools Statistics Modules User Window Help

Project: BST-SiO2

- Layer DMol3 GeomOpt
- BST-SiO2-KH-550 Forcite GeomOpt
  - BST-SiO2-KH-550 Forcite Dynamics
    - Interaction Energy
      - InteractionEnergy Script
        - final.xtd
        - InteractionEnergy.pl.out
        - all.txt
        - InteractionEnergy.pl
        - Layer1.txt
        - Layer2.txt
        - Layer\_IntEnergy.std
        - InteractionEnergy.pl
        - final.xtd

|    | A          | B                    | C       | D                 | E       | F                 | G                  | H                                            | I | J |
|----|------------|----------------------|---------|-------------------|---------|-------------------|--------------------|----------------------------------------------|---|---|
|    | Layer Cell | Energy of Layer Cell | Layer 1 | Energy of Layer 1 | Layer 2 | Energy of layer 2 | Interaction Energy | Interaction Energy per angstrom <sup>2</sup> |   |   |
| 34 | all        | 1.610910e+006        | Layer1  | 42.24227087       | Layer2  | 1.610876e+006     | -8.69394339        | -0.16840478                                  |   |   |
| 35 | all        | 1.662607e+006        | Layer1  | 55.82966594       | Layer2  | 1.662560e+006     | -8.49172965        | -0.16448783                                  |   |   |
| 36 | all        | 1.647156e+006        | Layer1  | 85.22582841       | Layer2  | 1.647077e+006     | -5.88220565        | -0.11394042                                  |   |   |
| 37 | all        | 1.735229e+006        | Layer1  | 75.02083285       | Layer2  | 1.735158e+006     | -4.64759022        | -0.09002548                                  |   |   |
| 38 | all        | 1.688777e+006        | Layer1  | 58.90970943       | Layer2  | 1.688728e+006     | -9.83618107        | -0.19053033                                  |   |   |
| 39 | all        | 1.796081e+006        | Layer1  | 68.04389940       | Layer2  | 1.796024e+006     | -11.14178664       | -0.21582038                                  |   |   |
| 40 | all        | 1.881987e+006        | Layer1  | 39.19919799       | Layer2  | 1.881931e+006     | 17.15023701        | 0.33220621                                   |   |   |
| 41 | all        | 1.938455e+006        | Layer1  | 62.26454502       | Layer2  | 1.938401e+006     | -8.62023206        | -0.16697697                                  |   |   |
| 42 | all        | 2.251583e+006        | Layer1  | 60.14421184       | Layer2  | 2.251531e+006     | -8.34840813        | -0.16171164                                  |   |   |
| 43 | all        | 2.366035e+006        | Layer1  | 54.00662881       | Layer2  | 2.365986e+006     | -4.97626300        | -0.09639199                                  |   |   |
| 44 | all        | 2.600313e+006        | Layer1  | 47.50836130       | Layer2  | 2.600271e+006     | -5.58628518        | -0.10820834                                  |   |   |
| 45 | all        | 2.447018e+006        | Layer1  | 45.35304978       | Layer2  | 2.446973e+006     | 0.02015970         | 3.905005e-004                                |   |   |
| 46 | all        | 2.309126e+006        | Layer1  | 54.56243710       | Layer2  | 2.309083e+006     | -10.85966824       | -0.21035565                                  |   |   |
| 47 | all        | 2.305256e+006        | Layer1  | 52.93258602       | Layer2  | 2.305214e+006     | -10.61620987       | -0.20563977                                  |   |   |
| 48 | all        | 2.375401e+006        | Layer1  | 53.86624353       | Layer2  | 2.375357e+006     | -8.94251422        | -0.17321969                                  |   |   |
| 49 | all        | 2.349696e+006        | Layer1  | 58.27498784       | Layer2  | 2.349648e+006     | -9.87474792        | -0.19127739                                  |   |   |
| 50 | all        | 2.639770e+006        | Layer1  | 47.26304195       | Layer2  | 2.639731e+006     | -7.34699842        | -0.14231388                                  |   |   |

Sheet 1

| Description | Job Id | Gateway | Server | Status | Progress | Resu |
|-------------|--------|---------|--------|--------|----------|------|
|-------------|--------|---------|--------|--------|----------|------|

Fig. 6-7

## 7 Film Thicknesses of Each Group

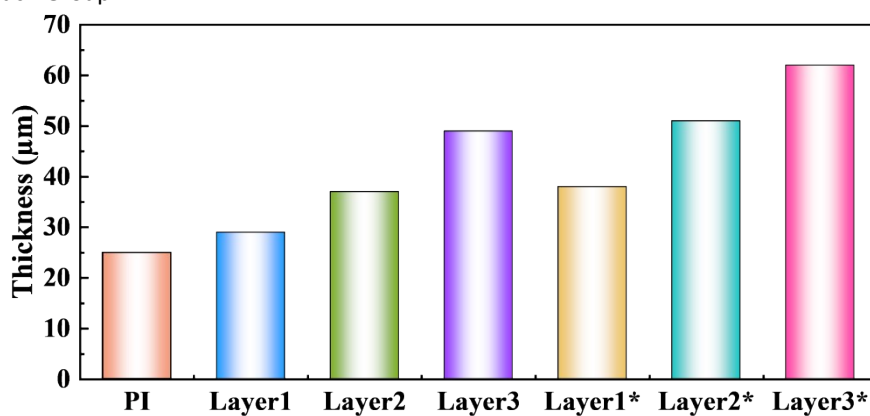

Fig. 7-1
